## MicroRNA - a contributor to age-associated neural stem cell dysfunction?

Muhammad Amir Khan and Dieter Chichung Lie

Research Group Adult Neural Stem Cells and Neurogenesis, Institute of Developmental Genetics, Helmholtz Zentrum München, German Research Center for Environmental Health, 85764 Munich-Neuherberg, Germany

**Commentary on:** Brett JO et al. The microRNA cluster miR-106b~25 regulates adult neural stem/progenitor cell proliferation and neuronal differentiation. *Aging*. 2011; 2:108-124.

**Received:** 3/11/11; **Accepted:** 3/11/11; **Published:** 3/12/11

**Corresponding author:** Muhammad Amir Khan; **Email:** amir.khan@helmholtz-muenchen.de

© Khan et al. This is an open-access article distributed under the terms of the Creative Commons Attribution License, which permits unrestricted use, distribution, and reproduction in any medium, provided the original author and source are credited.

In the adult mammalian brain, new neurons are continuously generated from neural stem cells in the subventricular zone (SVZ) of the lateral ventricles and the subgranular zone (SGZ) of the hippocampus [1]. Increasing evidence for the functional importance of adult-generated neurons in these regions for learning, complex behavior, and mood regulation, as well as a potential link of impaired adult neurogenesis to cognitive deficits in ageing and neurodegeneration have sparked great interest in the regulatory mechanisms underlying the coordinated generation of new functional neurons. Neurogenesis includes self-renewal and fate specification of neural stem cells, migration and maturation of young neurons, and functional integration of new neurons into the neural circuitry [1]. A large body of work has demonstrated that neurogenesis is regulated in a complex manner by the dynamic interplay of cell-extrinsic signals derived from the neurogenic “niche” and cell-intrinsic transcriptional and epigenetic regulators. More recently, microRNAs (miRNAs) have emerged as potent modulators of adult neurogenesis. miRNA 132 has been linked to the maturation and functional integration of newly generated hippocampal neurons and – in this context – is potentially regulated by hippocampal network activity and CREB-signalling [2]. Several miRNAs have also been implied in controlling the balance of stem cell maintenance and differentiation - a crucial checkpoint for sustaining adult neurogenesis throughout adulthood. In this context, miRNA-137 [3] and miRNA-184 [4] have been found to promote stem cell maintenance at the expense of differentiation, while miRNA-9 [5], miRNA lethal-7b (let-7b) [6, 7], and miRNA-124 [8] tip the balance from stem cell maintenance towards differentiation through

the negative regulation of cyclin D1 and the stem cell maintenance factors TLX, Hmga2, and Sox9. Intriguingly, the latter factors are transcriptional regulators and thus are likely to control the expression of larger sets of genes, which may explain the profound effects of those miRNAs in stem cell maintenance and differentiation.

In the February issue of *Aging* Brett and colleagues link the microRNA cluster miR-106b~25 to neural stem cell expansion and neuronal differentiation [9]. In this work, they demonstrate that miR-106b~25 promotes proliferation in primary neural stem cell cultures. Moreover they report that overexpression of miR-106b~25 enhances neural stem cell differentiation toward the neuronal lineage. Although the *in vitro* modulatory effects of miRNA-106b~25 on neural stem cell behaviour are relatively modest, the authors made several notable observations that imply this miRNA cluster as a critical regulator of adult neurogenesis and warrant further investigation of its function and regulation: Firstly, *in silico* predictions suggest that miRNA-25 may be involved in the modulation of transforming growth factor  $\beta$  (TGF $\beta$ )/bone morphogenic protein (BMP) and insulin/IGF signalling, i.e., signalling pathways that control neural stem cell quiescence, proliferation, and fate as well as age-related stem cell dysfunction in other organs. Secondly, the authors identify a functional FoxO3 binding site near the promoter for miR-106b~25, which modulates the activity of the miRNA cluster. Recent work identified FoxO transcription factors as crucial regulators of stem cell maintenance in the hematopoietic and the adult central nervous system, whose loss results in premature

depletion of the stem cell pool. Notably, FoxO transcription factor-dependent pathways control ageing and longevity in *C.elegans* and *Drosophila melanogaster* and certain FoxO3 gene variants are associated with increased lifespan in people [10].

Hence, the miRNA-106b~25 cluster may emerge as an important modulator of ageing in neural stem cells and the neurogenic niches. The *in vivo* function of miRNA-106b~25 in neural stem cell behaviour and neurogenesis has to be determined and it will be particularly interesting to determine the impact of ageing on the activity of the miRNA-106b~25 cluster in neural stem cells and their progeny. Moreover, it will be important to understand if and how the miRNA-106b~25 cluster is controlled by signals derived from the neurogenic environment, given the evidence that major shifts in pathway activities contribute to stem cell dysfunction during ageing. In the long run, determining functional targets of miRNA-106b~25 in the adult neurogenic lineage may reveal novel pathways in the control of neurogenesis, which may be harnessed for treatment of age-associated cognitive deficits.

## ACKNOWLEDGEMENTS

Work in the Lie lab is supported by the European Young Investigator Award of the European Science Foundation (DFG 858/6-2), the Marie Curie Excellence Team Program of the European Union, the Bavarian Research Network on Adult Neural Stem Cells "FORNEUROCELL", and the Helmholtz Alliance for Mental Health in an Ageing Society, the BMBF Network "Cell Based Regenerative Medicine".

## REFERENCES

1. Zhao C, Deng W, Gage FH. Mechanisms and functional implications of adult neurogenesis. *Cell*. 2008;132: 645-660.
2. Magill ST, Cambronne XA, Luikart BW, Liou DT, Leighton BH, Westbrook GL, Mandel G, Goodman RH. microRNA-132 regulates dendritic growth and arborization of newborn neurons in the adult hippocampus. *Proc Natl Acad Sci U S A*. 2010;107: 20382-20387.
3. Szulwach KE, Li X, Smrt RD, Li Y, Luo Y, Lin L, Santistevan NJ, Li W, Zhao X, Jin P. Cross talk between microRNA and epigenetic regulation in adult neurogenesis. *J Cell Biol*. 2010;189: 127-141.
4. Liu C, Teng ZQ, Santistevan NJ, Szulwach KE, Guo W, Jin P, Zhao X. Epigenetic regulation of miR-184 by MBD1 governs neural stem cell proliferation and differentiation. *Cell Stem Cell*. 2010;6:433-444.
5. Zhao C, Sun G, Li S, Shi Y. A feedback regulatory loop involving microRNA-9 and nuclear receptor TLX in neural stem cell fate determination. *Nat Struct Mol Biol*. 2009;16: 365-371.
6. Nishino J, Kim I, Chada K, Morrison SJ. Hmga2 promotes neural stem cell self-renewal in young but not old mice by

reducing p16Ink4a and p19Arf Expression. *Cell*. 2008;135:227-239.

7. Zhao C, Sun G, Li S, Lang MF, Yang S, Li W, Shi Y. MicroRNA let-7b regulates neural stem cell proliferation and differentiation by targeting nuclear receptor TLX signaling. *Proc Natl Acad Sci U S A*. 2010;107:1876-1881.

8. Cheng LC, Pastrana E, Tavazoie M, Doetsch F. miR-124 regulates adult neurogenesis in the subventricular zone stem cell niche. *Nat Neurosci*. 2009;12:399-408.

9. Brett JO, Renault VM, Rafalski VA, Webb AE, Brunet A. The microRNA cluster miR-106b~25 regulates adult neural stem/progenitor cell proliferation and neuronal differentiation. *Aging (Albany NY)*. 2011;3:108-124.

10. Willcox BJ, Donlon TA, He Q, Chen R, Grove JS, Yano K, Masaki KH, Willcox DC, Rodriguez B, Curb JD. FOXO3A genotype is strongly associated with human longevity. *Proc Natl Acad Sci U S A*. 2008;105:13987-13992.
